# Supplementary material for: Continental lowlands face rising crop vulnerability: structural change in regional climate sensitivity of crop yields, Hungary (Central and Eastern Europe), 1921–2010
Source: Springer Nature journal article supplement (doi:10.1007/s10113-024-02192-w), 2024-02-22
Supplement: MOESM1 [file 10113_2024_2192_MOESM1_ESM.pdf]

Supplementary material to Pinke et al. (2024) Continental lowlands face rising crop vulnerability: structural change in regional climate sensitivity of crop yields, Hungary (Central and Eastern Europe), 1921–2010. Regional Environmental Change

To identify and delimit the geographical regions for a comparative investigation, cluster analysis using Ward's method and squared Euclidean distance was carried out with the 5-y average of wheat and maize yields of the counties between 1921 and 2010 as variables. Calculation was carried out using SPSS 23 (REF). The results were visualised on dendrograms to identify the composition of groups properly (Figure S5, S9). In order to trace the temporal stability of the clusters, the time series were split, and the investigation was repeated for the three 30-y intervals (1921–1950; 1951–1980; 1981–2010) defined previously (Fig. S2–S4 and S6–S8).

The results show, that:

1. The cluster analysis resulted in different territorial sub-groups in the case of wheat and maize referring to different ecological characters of wheat and maize (Figure S5, S9).
2. Clusters did not display temporal stability for the three 30-y periods; this refers to differentiation in technical advance and changing climatic conditions (Figure S1 and Figures S2–S4 / S6–S8).

We therefore concluded that stable and homogeneous regions of wheat and maize production couldn't be delimited based solely on one variable, i.e. the yield, as its spatial pattern showed great variance over time. For this reason, other indicators were also included in the investigation to delimit regions (shown on Table S1).

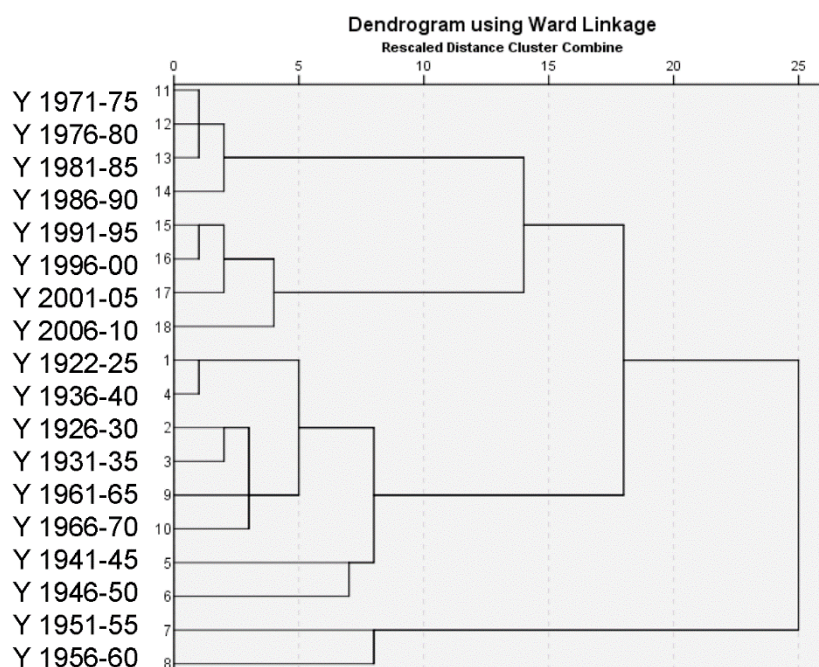

Fig. S1 Similarities and differences of 5-year intervals based on the wheat production of the counties for 1921–2010

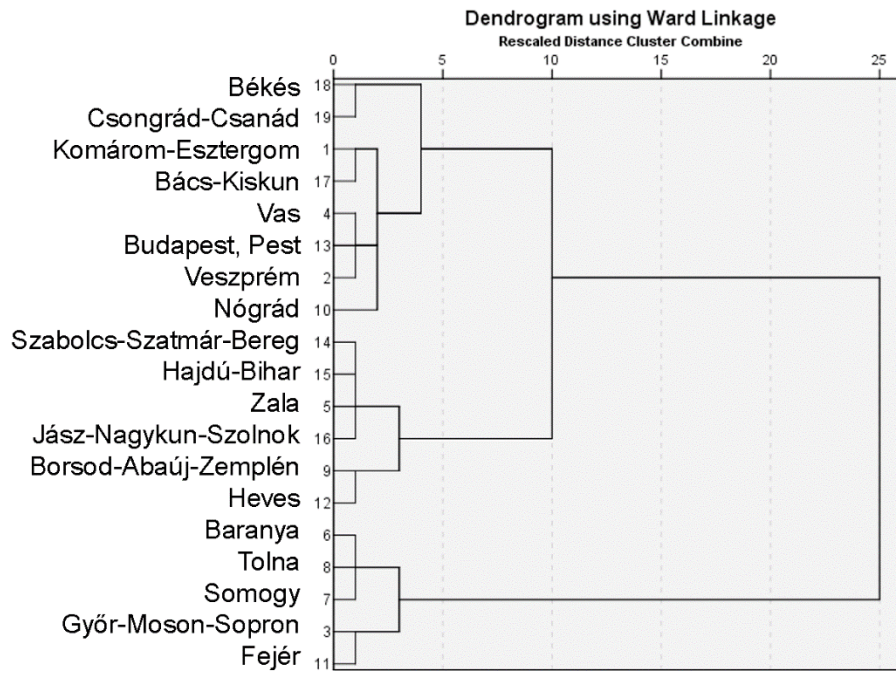

Fig. S2 Dendrogram indicating similarities and differences between the counties of Hungary for wheat yields based on the 5-year averages for 1921–1950

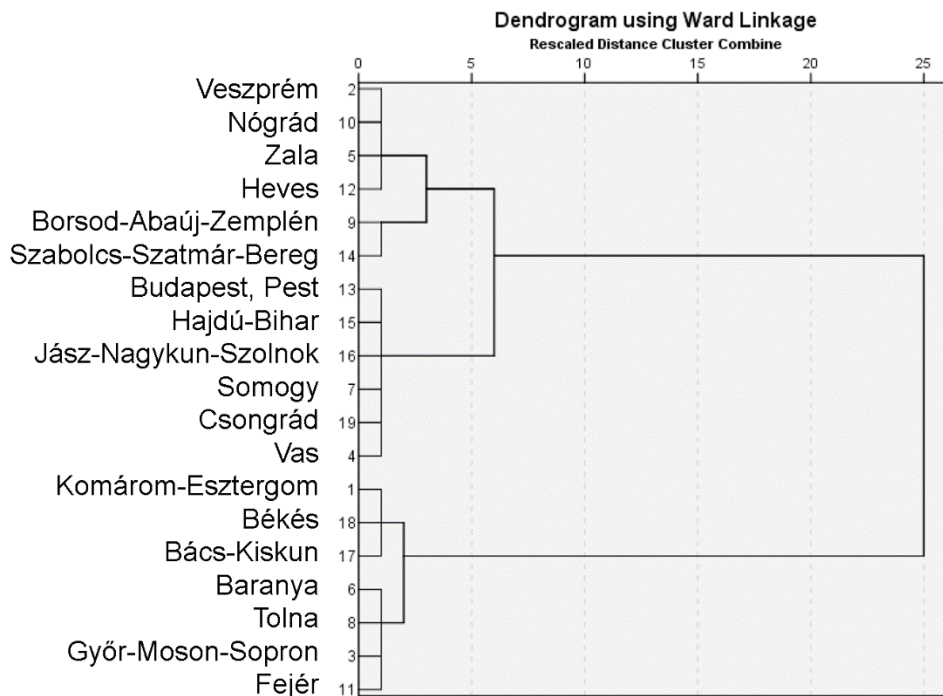

Fig. S3 Dendrogram indicating similarities and differences between the counties of Hungary for wheat yields based on the 5-year averages for 1951–1980

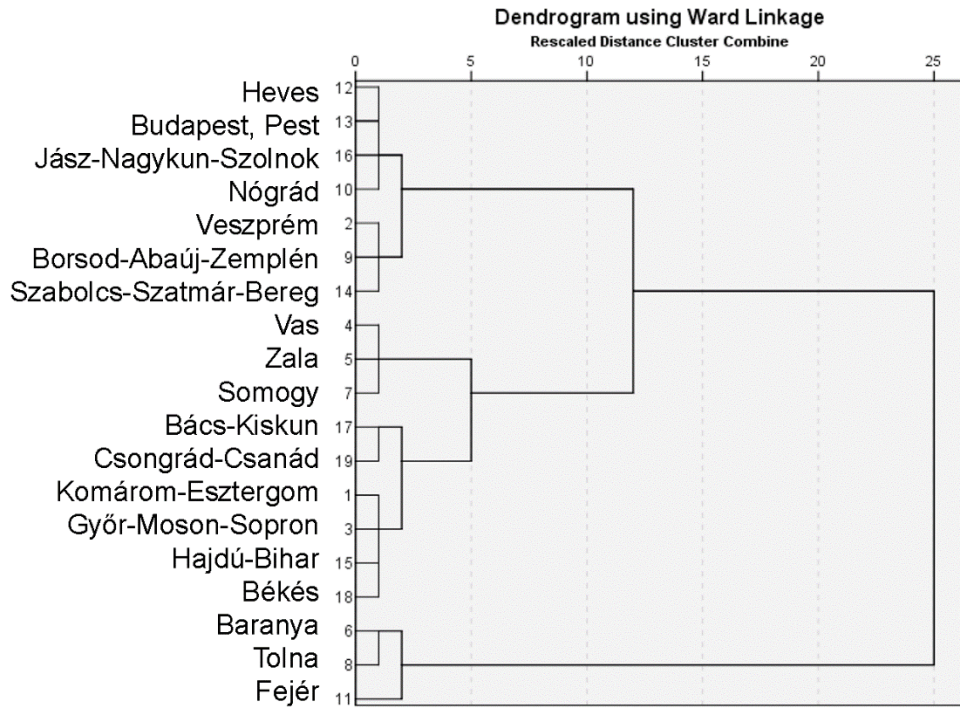

Fig. S4 Dendrogram indicating similarities and differences between the counties of Hungary for wheat yields based on the 5-year averages of 1981–2010

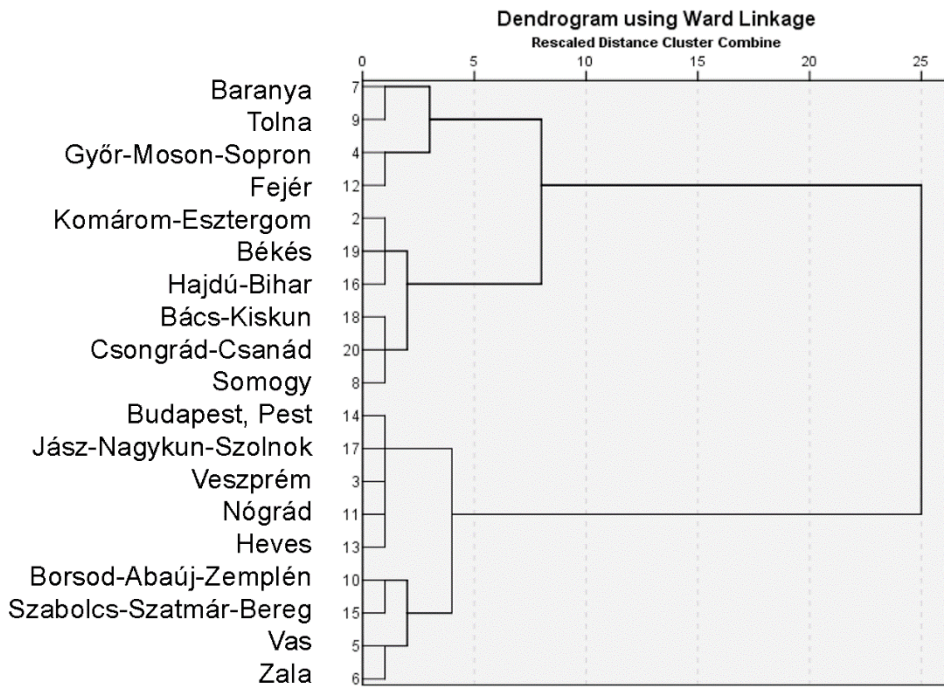

Fig. S5 Dendrogram indicating similarities and differences between the counties of Hungary for wheat yields based on the 5-year averages for 1921–2010

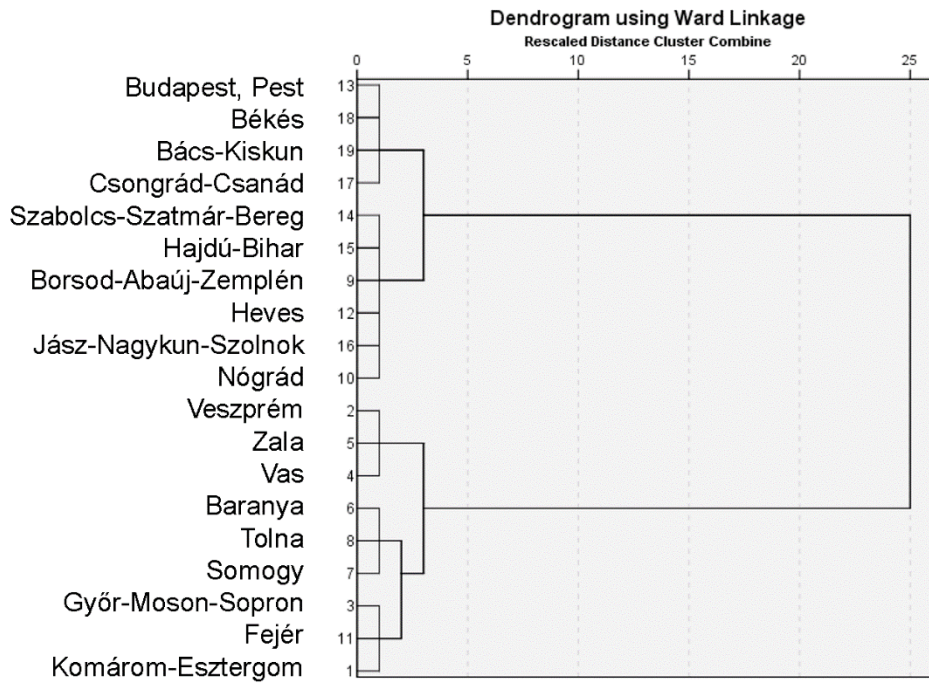

Fig. S6 Dendrogram indicating similarities and differences between the counties of Hungary for maize yields based on the 5-year averages for 1921–1950

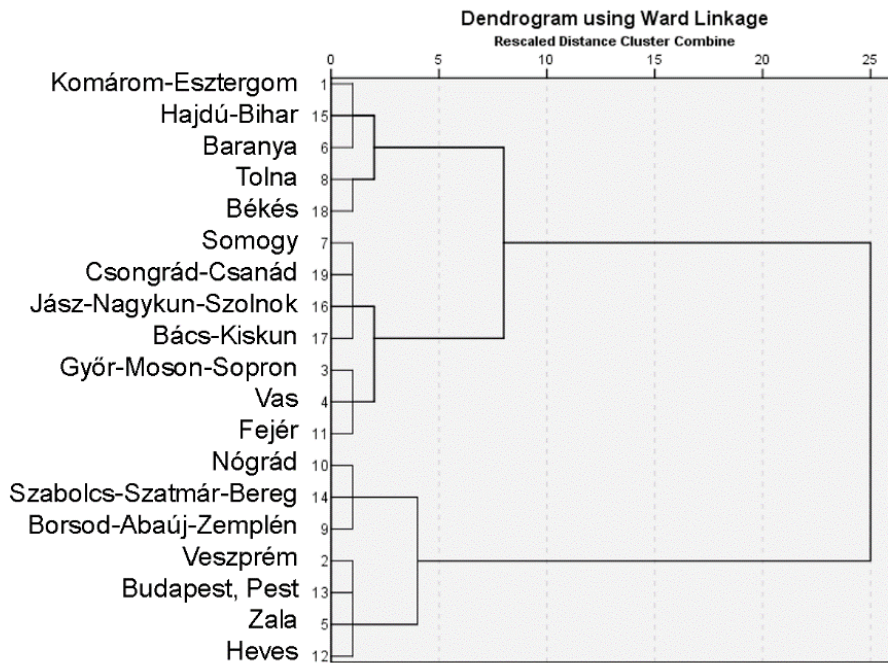

Fig. S7 Dendrogram indicating similarities and differences between the counties of Hungary for maize yields based on the 5-year averages for 1951–1980

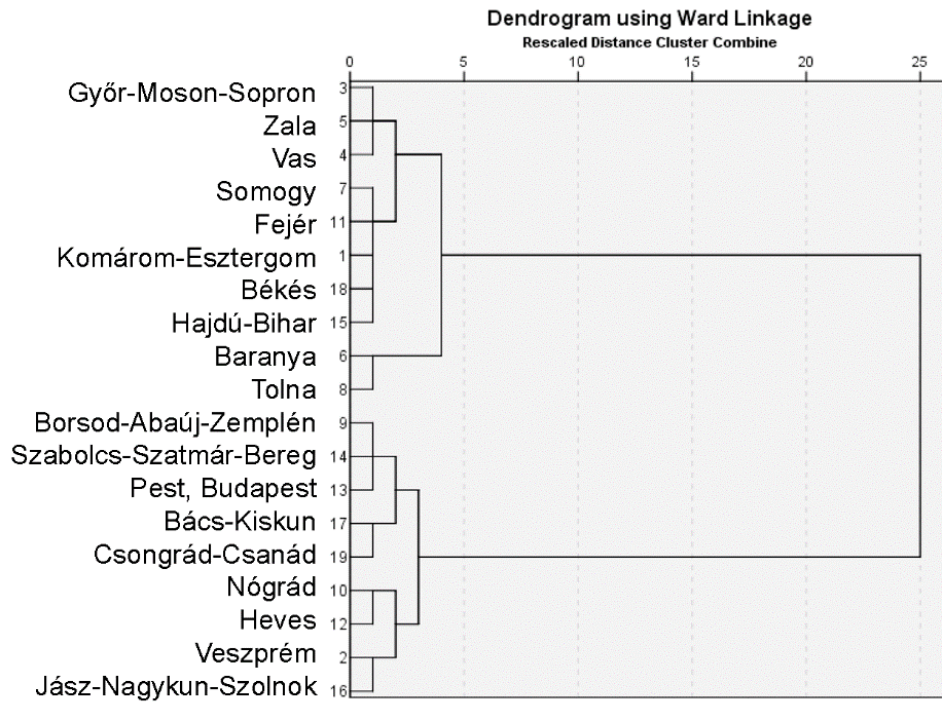

Fig. S8 Dendrogram indicating similarities and differences between the counties of Hungary for maize yields based on the 5-year averages for 1981–2010

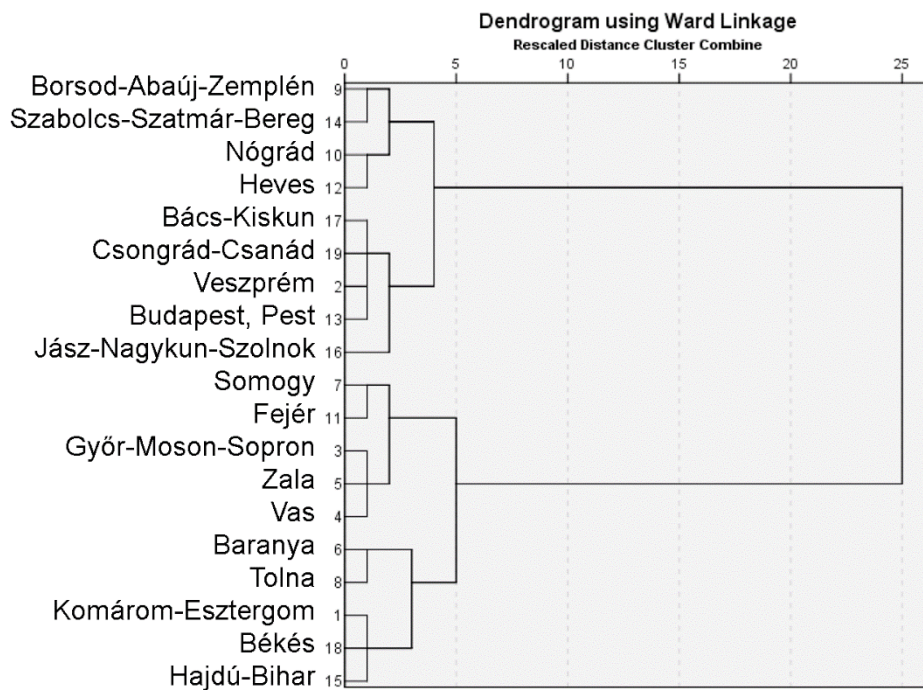

Fig. S9 Dendrogram indicating similarities between the counties of Hungary for maize yields based on the 5-year averages for 1921–2010

Table S1 Yield averages ( $\text{t ha}^{-1} \pm \text{SD}$ ) of wheat and maize, mean monthly temperatures during January–March and May–August and precipitation during February–July and May–August in four agroecological regions of Hungary for three 30-y periods between 1921 and 2010.

|                        | 1921–1950                                       | 1951–1980       | 1981–2010        | 1921–1950                                      | 1951–1980        | 1981–2010        |
|------------------------|-------------------------------------------------|-----------------|------------------|------------------------------------------------|------------------|------------------|
|                        | Wheat, $\text{t ha}^{-1}$                       |                 |                  | Maize, $\text{t ha}^{-1}$                      |                  |                  |
| Hungarian Plain        | $1.2 \pm 0.1$                                   | $2.2 \pm 0.5^*$ | $3.7 \pm 0.4^*$  | $1.4 \pm 0.2$                                  | $2.8 \pm 0.5^*$  | $4.9 \pm 0.5^*$  |
| Transdanubian Lowlands | $1.5 \pm 0.1$                                   | $2.6 \pm 0.6^*$ | $4.7 \pm 0.3^*$  | $2.0 \pm 0.2$                                  | $3.4 \pm 0.6^*$  | $6.2 \pm 0.7^*$  |
| Transdanubian Hills    | $1.3 \pm 0.1$                                   | $2.4 \pm 0.5^*$ | $4.0 \pm 0.3^*$  | $1.7 \pm 0.2$                                  | $3.0 \pm 0.5^*$  | $5.4 \pm 0.6^*$  |
| Highlands              | $1.1 \pm 0.1$                                   | $2.2 \pm 0.4^*$ | $3.9 \pm 0.4^*$  | $1.4 \pm 0.2$                                  | $2.7 \pm 0.4^*$  | $4.6 \pm 0.6^*$  |
|                        | Mean temperature <sub>May–July</sub> , °C       |                 |                  | Maximum temperature <sub>May–August</sub> , °C |                  |                  |
| Hungarian Plain        | $18.7 \pm 0.5$                                  | $18.4 \pm 0.4$  | $19.3 \pm 0.5^*$ | $25.8 \pm 0.6$                                 | $25.0 \pm 0.6^*$ | $26.1 \pm 0.6^*$ |
| Transdanubian Lowlands | $17.7 \pm 0.5$                                  | $17.6 \pm 0.4$  | $18.7 \pm 0.5^*$ | $24.3 \pm 0.6$                                 | $23.7 \pm 0.4^*$ | $24.9 \pm 0.6^*$ |
| Transdanubian Hills    | $17.8 \pm 0.5$                                  | $17.6 \pm 0.4$  | $18.8 \pm 0.5^*$ | $24.9 \pm 0.6$                                 | $24.2 \pm 0.5^*$ | $25.4 \pm 0.6^*$ |
| Highlands              | $18.6 \pm 0.5$                                  | $18.4 \pm 0.4$  | $19.3 \pm 0.5^*$ | $25.6 \pm 0.6$                                 | $24.8 \pm 0.4^*$ | $25.9 \pm 0.6^*$ |
|                        | Precipitation <sub>February–July</sub> , mm     |                 |                  | Precipitation <sub>May–August</sub> , mm       |                  |                  |
| Hungarian Plain        | $282 \pm 33$                                    | $288 \pm 36$    | $288 \pm 37$     | $228 \pm 35$                                   | $244 \pm 35$     | $239 \pm 36$     |
| Transdanubian Lowlands | $340 \pm 33$                                    | $364 \pm 40$    | $334 \pm 34$     | $269 \pm 38$                                   | $298 \pm 35$     | $293 \pm 35$     |
| Transdanubian Hills    | $304 \pm 33$                                    | $314 \pm 34$    | $295 \pm 34$     | $258 \pm 33$                                   | $275 \pm 32$     | $266 \pm 36$     |
| Highlands              | $286 \pm 35$                                    | $293 \pm 30$    | $295 \pm 38$     | $230 \pm 36$                                   | $249 \pm 36$     | $243 \pm 37$     |
|                        | Precipitation–PET <sub>February–July</sub> , mm |                 |                  | Precipitation–PET <sub>May–August</sub> , mm   |                  |                  |
| Hungarian Plain        | $-245 \pm 43$                                   | $-223 \pm 41$   | $-253 \pm 47$    | $-272 \pm 44$                                  | $-237 \pm 47$    | $-271 \pm 49$    |
| Transdanubian Lowlands | $-171 \pm 43$                                   | $-137 \pm 47$   | $-205 \pm 45^*$  | $-212 \pm 49$                                  | $-167 \pm 42$    | $-209 \pm 47^*$  |
| Transdanubian Hills    | $-200 \pm 41$                                   | $-180 \pm 42$   | $-237 \pm 45^*$  | $-215 \pm 43$                                  | $-183 \pm 40$    | $-229 \pm 48^*$  |
| Highlands              | $-214 \pm 44$                                   | $-194 \pm 42$   | $-218 \pm 46$    | $-239 \pm 45$                                  | $-205 \pm 47$    | $-236 \pm 48$    |

SD: standard deviation; PET: potential evapotranspiration; \*Significant difference from the previous period ( $p < .05$ ) using Welch t-test. Source: KSH 2023, OMSZ 2022, CRU TS 4.07.

Table S2 Winter (October–March) and summer (April–September) half years, as well as annual averages of mean monthly temperature ( $\pm$  S.D.) and sums of precipitation in four agroecological regions of Hungary for three 30-y periods between 1921 and 2010

| Regions                | 1921–1950      | 1951–1980      | 1981–2010       |
|------------------------|----------------|----------------|-----------------|
| Mean temperature, °C   |                |                |                 |
| Year                   |                |                |                 |
| Hungarian Plain        | 10.2 $\pm$ 0.4 | 10.2 $\pm$ 0.3 | 10.8* $\pm$ 0.4 |
| Transdanubian Lowlands | 9.7 $\pm$ 0.4  | 9.7 $\pm$ 0.3  | 10.5* $\pm$ 0.4 |
| Transdanubian Hills    | 9.6 $\pm$ 0.4  | 9.7 $\pm$ 0.3  | 10.5* $\pm$ 0.4 |
| Highlands              | 9.9 $\pm$ 0.4  | 10.1 $\pm$ 0.3 | 10.7* $\pm$ 0.4 |
| October–March          |                |                |                 |
| Hungarian Plain        | 3.1 $\pm$ 0.7  | 3.4 $\pm$ 0.5  | 3.7 $\pm$ 0.6   |
| Transdanubian Lowlands | 2.7 $\pm$ 0.6  | 3.1 $\pm$ 0.5  | 3.7* $\pm$ 0.6  |
| Transdanubia, hills    | 2.9 $\pm$ 0.7  | 3.3 $\pm$ 0.5  | 3.8* $\pm$ 0.6  |
| Highlands              | 2.7 $\pm$ 0.7  | 3.2 $\pm$ 0.5  | 3.6* $\pm$ 0.6  |
| April–September        |                |                |                 |
| Hungarian Plain        | 17.3 $\pm$ 0.4 | 17.1 $\pm$ 0.4 | 17.9* $\pm$ 0.4 |
| Transdanubian Lowlands | 16.3 $\pm$ 0.4 | 16.3 $\pm$ 0.3 | 17.1* $\pm$ 0.4 |
| Transdanubia, hills    | 16.3 $\pm$ 0.4 | 16.4 $\pm$ 0.3 | 17.3* $\pm$ 0.4 |
| Highlands              | 17.0 $\pm$ 0.4 | 17.1 $\pm$ 0.3 | 17.7* $\pm$ 0.4 |
| May–August             |                |                |                 |
| Hungarian Plain        | 19.1 $\pm$ 0.5 | 18.8 $\pm$ 0.3 | 19.8* $\pm$ 0.5 |
| Transdanubian Lowlands | 18.2 $\pm$ 0.5 | 18.1 $\pm$ 0.3 | 19.2* $\pm$ 0.5 |
| Transdanubia, hills    | 18.2 $\pm$ 0.4 | 18.0 $\pm$ 0.3 | 19.2* $\pm$ 0.5 |
| Highlands              | 18.9 $\pm$ 0.5 | 18.8 $\pm$ 0.4 | 19.8* $\pm$ 0.5 |
| January–March          |                |                |                 |
| Hungarian Plain        | 0.9 $\pm$ 1.1  | 1.2 $\pm$ 1.0  | 1.9 $\pm$ 1.0   |
| Transdanubian Lowlands | 1.2 $\pm$ 1.1  | 1.6 $\pm$ 0.9  | 2.4 $\pm$ 1.0   |
| Transdanubia, hills    | 0.9 $\pm$ 1.0  | 1.2 $\pm$ 0.9  | 2.1 $\pm$ 1.0   |
| Highlands              | 0.6 $\pm$ 1.1  | 1.1 $\pm$ 1.0  | 1.9 $\pm$ 1.0   |
| Precipitation, mm      |                |                |                 |
| Year                   |                |                |                 |
| Hungarian Plain        | 544 $\pm$ 49   | 537 $\pm$ 44   | 536 $\pm$ 48    |
| Transdanubian Lowlands | 654 $\pm$ 53   | 632 $\pm$ 44   | 623 $\pm$ 44    |
| Transdanubia, hills    | 587 $\pm$ 51   | 581 $\pm$ 44   | 569 $\pm$ 46    |
| Highlands              | 549 $\pm$ 47   | 549 $\pm$ 49   | 548 $\pm$ 53    |
| October–March          |                |                |                 |
| Hungarian Plain        | 179 $\pm$ 23   | 171 $\pm$ 20   | 163 $\pm$ 18    |
| Transdanubian Lowlands | 283 $\pm$ 38   | 255 $\pm$ 32   | 240 $\pm$ 23    |
| Transdanubia, hills    | 155 $\pm$ 21   | 149 $\pm$ 16   | 145 $\pm$ 16    |
| Highlands              | 155 $\pm$ 20   | 152 $\pm$ 17   | 146 $\pm$ 17    |
| April–September        |                |                |                 |
| Hungarian Plain        | 263 $\pm$ 27   | 262 $\pm$ 27   | 263 $\pm$ 32    |
| Transdanubian Lowlands | 369 $\pm$ 40   | 379 $\pm$ 38   | 377 $\pm$ 38    |
| Transdanubia, hills    | 294 $\pm$ 26   | 289 $\pm$ 27   | 278 $\pm$ 25    |
| Highlands              | 256 $\pm$ 28   | 250 $\pm$ 29   | 255 $\pm$ 27    |

\*Significant difference from the previous period ( $p < .05$ ) using Welch t-test. SD = standard deviation.

Source: OMSZ

Table S3 Differences between annual mean temperature and precipitation sums in four agroecological regions of Hungary for three 30-y periods between 1921 and 2010, Welch t values/p-values (df = 29)

|                                        | Hungarian Plain | Transdanubia Lowlands | Transdanubia Hills | Highlands |
|----------------------------------------|-----------------|-----------------------|--------------------|-----------|
| Annual precipitation sums, mm          |                 |                       |                    |           |
| 1921–1950                              |                 |                       |                    |           |
| Hungarian Plain                        | 1               | <0.01                 | <0.01              | 0.48      |
| Transdanubia Lowlands                  | 8.71            | 1                     | <0.01              | <0.01     |
| Transdanubia Hills                     | 3.24            | -6.22                 | 1                  | <0.01     |
| Highlands                              | 0.71            | -10.93                | 3.12               | 1         |
| 1951–1980                              |                 |                       |                    |           |
| Hungarian Plain                        | 1               | <0.01                 | <0.01              | 0.37      |
| Transdanubia Lowlands                  | 6.24            | 1                     | <0.01              | <0.01     |
| Transdanubia Hills                     | 2.28            | -5.11                 | 1                  | 0.03      |
| Highlands                              | 0.90            | -7.96                 | 2.6                | 1         |
| 1981–2010                              |                 |                       |                    |           |
| Hungarian Plain                        | 1               | <0.01                 | <0.01              | 0.02      |
| Transdanubia Lowlands                  | 5.89            | 1                     | <0.01              | <0.01     |
| Transdanubia Hills                     | 2.47            | -5.24                 | 1                  | <0.01     |
| Highlands                              | 2.47            | -5.02                 | 2.3                | 1         |
| Annual average of mean temperature, °C |                 |                       |                    |           |
| 1921–1950                              |                 |                       |                    |           |
| Hungarian Plain                        | 1               | <0.01                 | <0.01              | <0.01     |
| Transdanubia Lowlands                  | 15.35           | 1                     | <0.01              | <0.01     |
| Transdanubia Hills                     | 19.71           | -3.75                 | 1                  | <0.01     |
| Highlands                              | 23.16           | 6.05                  | 9.82               | 1         |
| 1951–1980                              |                 |                       |                    |           |
| Hungarian Plain                        | 1               | <0.01                 | <0.01              | <0.01     |
| Transdanubia Lowlands                  | 13.63           | 1                     | 0.45               | <0.01     |
| Transdanubia Hills                     | 12.84           | -0.77                 | 1                  | <0.01     |
| Highlands                              | 11.02           | 11.16                 | 10.86              | 1         |
| 1981–2010                              |                 |                       |                    |           |
| Hungarian Plain                        | 1               | <0.01                 | <0.01              | <0.01     |
| Transdanubia Lowlands                  | 5.43            | 1                     | 0.51               | <0.01     |
| Transdanubia Hills                     | 7.28            | 0.67                  | 1                  | <0.01     |
| Highlands                              | 4.78            | 11.795                | 5.51               | 1         |

Source: OMSZ



Table S4 Differences between regional wheat and maize yield averages in four agroecological regions of Hungary for three 30-y periods between 1921 and 2010, Welch t values/p-values (df = 29)

|                           | Hungarian Plain | Transdanubia Lowlands | Transdanubia Hills | Highlands |
|---------------------------|-----------------|-----------------------|--------------------|-----------|
| Wheat, t ha <sup>-1</sup> |                 |                       |                    |           |
| 1921–1950                 |                 |                       |                    |           |
| Hungarian Plain           | 1               | <0.01                 | 0.03               | 0.13      |
| Transdanubia Lowlands     | -6.54           | 1                     | <0.01              | <0.01     |
| Transdanubia Hills        | -2.26           | -10.87                | 1                  | <0.01     |
| Highlands                 | 1.55            | -8.55                 | -4.17              | 1         |
| 1951–1980                 |                 |                       |                    |           |
| Hungarian Plain           | 1               | <0.01                 | <0.01              | 0.37      |
| Transdanubia Lowlands     | -8.86           | 1                     | <0.01              | <0.01     |
| Transdanubia Hills        | -5.15           | -6.01                 | 1                  | <0.01     |
| Highlands                 | 0.90            | -7.96                 | 6.76               | 1         |
| 1981–2010                 |                 |                       |                    |           |
| Hungarian Plain           | 1               | <0.01                 | <0.01              | <0.01     |
| Transdanubia Lowlands     | -16.26          | 1                     | <0.01              | <0.01     |
| Transdanubia Hills        | 13.78           | -6.85                 | 1                  | <0.01     |
| Highlands                 | -3.64           | 11.795                | 9.34               | 1         |
| Maize, t ha <sup>-1</sup> |                 |                       |                    |           |
| 1921–1950                 |                 |                       |                    |           |
| Hungarian Plain           | 1               | <0.01                 | <0.01              | 0.06      |
| Transdanubia Lowlands     | -13.87          | 1                     | <0.01              | <0.01     |
| Transdanubia Hills        | -10.22          | -11.71                | 1                  | <0.01     |
| Highlands                 | -1.94           | -12.61                | -8.60              | 1         |
| 1951–1980                 |                 |                       |                    |           |
| Hungarian Plain           | 1               | <0.01                 | <0.01              | 0.13      |
| Transdanubia Lowlands     | -10.83          | 1                     | <0.01              | <0.01     |
| Transdanubia Hills        | -7.08           | -7.18                 | 1                  | <0.01     |
| Highlands                 | 1.55            | -6.58                 | -5.32              | 1         |
| 1981–2010                 |                 |                       |                    |           |
| Hungarian Plain           | 1               | <0.01                 | <0.00              | <0.01     |
| Transdanubia Lowlands     | -10.24          | 1                     | <0.01              | <0.01     |
| Transdanubia Hills        | -5.09           | -4.94                 | 1                  | <0.01     |
| Highlands                 | 4.25            | -12.13                | -7.42              | 1         |

Source: KSH

Table S5 Estimated yield impact ( $\Delta t \text{ ha}^{-1} \text{ year}^{-1}$ ) of changing mean temperature ( $\Delta^\circ\text{C}$ ) and water deficit ( $\Delta\text{mm}$ ) from 1951–1980 to 1981–2010

| Wheat                  |                                                                                                       |                                                                                                                |                                                            |
|------------------------|-------------------------------------------------------------------------------------------------------|----------------------------------------------------------------------------------------------------------------|------------------------------------------------------------|
| Region                 | Equation,<br>$T_{\text{meanMay-July}} \sim \text{wheat yield}$                                        | $x_1 = T_{\text{meanMay-July}},$<br>$\Delta^\circ\text{C}$                                                     | Yield impact,<br>$\Delta t \text{ ha}^{-1} \text{ y}^{-1}$ |
| Hungarian Plain        | $y = -0.5703x_1 - 0.0004$                                                                             | 0.9                                                                                                            | -0.51                                                      |
| Transdanubian Lowlands | $y = -0.418x_1 + 0.0234$                                                                              | 1.1                                                                                                            | -0.44                                                      |
| Transdanubian Hills    | $y = -0.3297x_1 + 0.0085$                                                                             | 1.2                                                                                                            | -0.50                                                      |
| Highlands              | $y = -0.5703x_1 - 0.0004$                                                                             | 0.9                                                                                                            | -0.56                                                      |
| Wheat (continued)      |                                                                                                       |                                                                                                                |                                                            |
| Region                 | Equation, $T_{\text{meanMay-July}} + T_{\text{meanJan-March}} \sim$<br>$\text{wheat yield}$           | $x_2 = T_{\text{meanJan-March}},$<br>$\Delta^\circ\text{C}$                                                    | Yield impact,<br>$\Delta t \text{ ha}^{-1} \text{ y}^{-1}$ |
| Hungarian Plain        | $y = 0.00003 + (-0.60097x_1) + (0.14167x_2)$                                                          | 0.8                                                                                                            | -0.43                                                      |
| Transdanubian Lowlands | $y = 0.01794 + (-0.42641x_1) + (0.16135x_2)$                                                          | 0.8                                                                                                            | -0.32                                                      |
| Transdanubian Hills    | $y = 0.03027 + (-0.42641x_1) + (0.16465x_2)$                                                          | 0.9                                                                                                            | -0.33                                                      |
| Highlands              | $y = 0.02245 + (-0.62839x_1) + (0.1718x_2)$                                                           | 0.8                                                                                                            | -0.41                                                      |
| Maize                  |                                                                                                       |                                                                                                                |                                                            |
| Region                 | Equation,<br>$\text{Prec-PET}_{\text{May-Aug}} \sim \text{maize yield}$                               | $x = \text{Prec-PET}_{\text{May-Aug}},$<br>$\Delta\text{mm}$                                                   | Yield impact,<br>$\Delta t \text{ ha}^{-1} \text{ y}^{-1}$ |
| Hungarian Plain        | $y = -0.8388x + 0.0192$                                                                               | -34                                                                                                            | -0.28                                                      |
| Transdanubian Lowlands | $y = -0.418x + 0.0234$                                                                                | -42                                                                                                            | -0.46                                                      |
| Transdanubian Hills    | $y = 0.0216x + 0.0079$                                                                                | -46                                                                                                            | -0.44                                                      |
| Highlands              | $y = -0.667x + 0.0361$                                                                                | -31                                                                                                            | -0.25                                                      |
| Maize (continued)      |                                                                                                       |                                                                                                                |                                                            |
| Region                 | Equation, $T_{\text{meanMay-Aug}} + \text{Prec}_{\text{May-Aug}} \sim \text{maize}$<br>$\text{yield}$ | $x_1 = T_{\text{meanMay-Aug}}, \Delta^\circ\text{C};$<br>$x_2 = \text{Prec}_{\text{May-Aug}}, \Delta\text{mm}$ | Yield impact,<br>$\Delta t \text{ ha}^{-1} \text{ y}^{-1}$ |
| Hungarian Plain        | $y = -0.004760 + (-0.567326x_1) + (0.005117x_2)$                                                      | 1.0; -5                                                                                                        | -0.60                                                      |
| Transdanubian Lowlands | $y = -0.010707 + (-0.575951x_1) + (0.00904x_2)$                                                       | 1.1; -5                                                                                                        | -0.69                                                      |
| Transdanubian Hills    | $y = 0.002869 + (-0.497103x_1) + (0.008771x_2)$                                                       | 1.2; -9                                                                                                        | -0.67                                                      |
| Highlands              | $y = -0.009075 + (-0.479266x_1) + (0.005074x_2)$                                                      | 1.0; -6                                                                                                        | -0.52                                                      |

$T_{\text{mean}}$ : mean temperature;  $\text{Prec-PET}$ : precipitation sum minus potential evapotranspiration

sum;  $\text{Prec}$ : precipitation sum;  $y$ : yield change.
